# Supplementary material
Source: MDPI journal article supplement (https://www.mdpi.com/1999-4907/13/10/1635)
Supplement: s1 [file s1 › forests-1924636-supplementary.pdf]

Supplementary Materials:

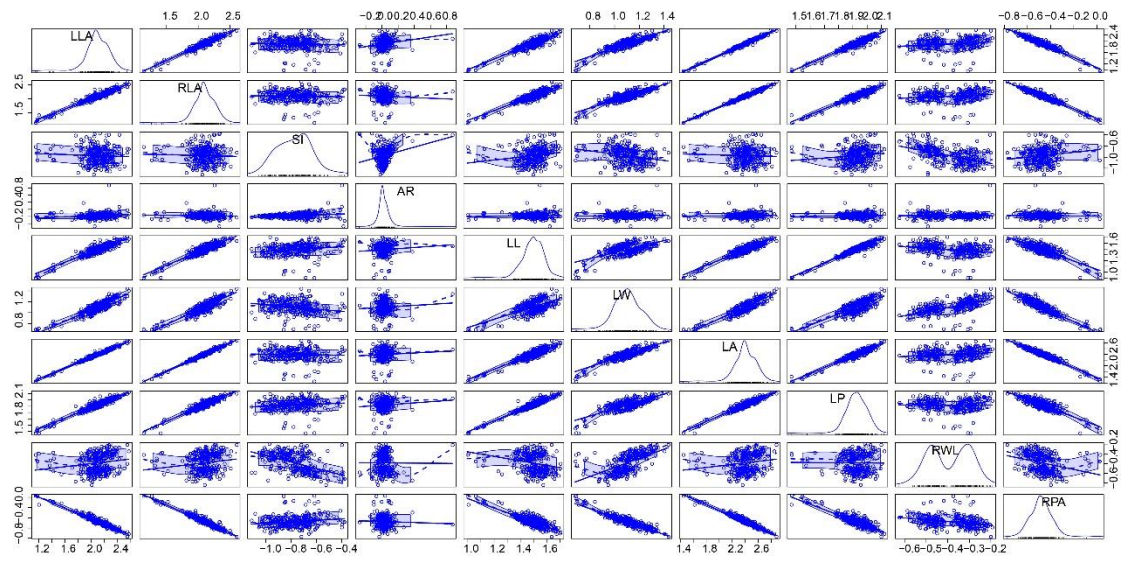

**Figure S1.** Normal distribution detection for the 10 leaf-shaped indicators.

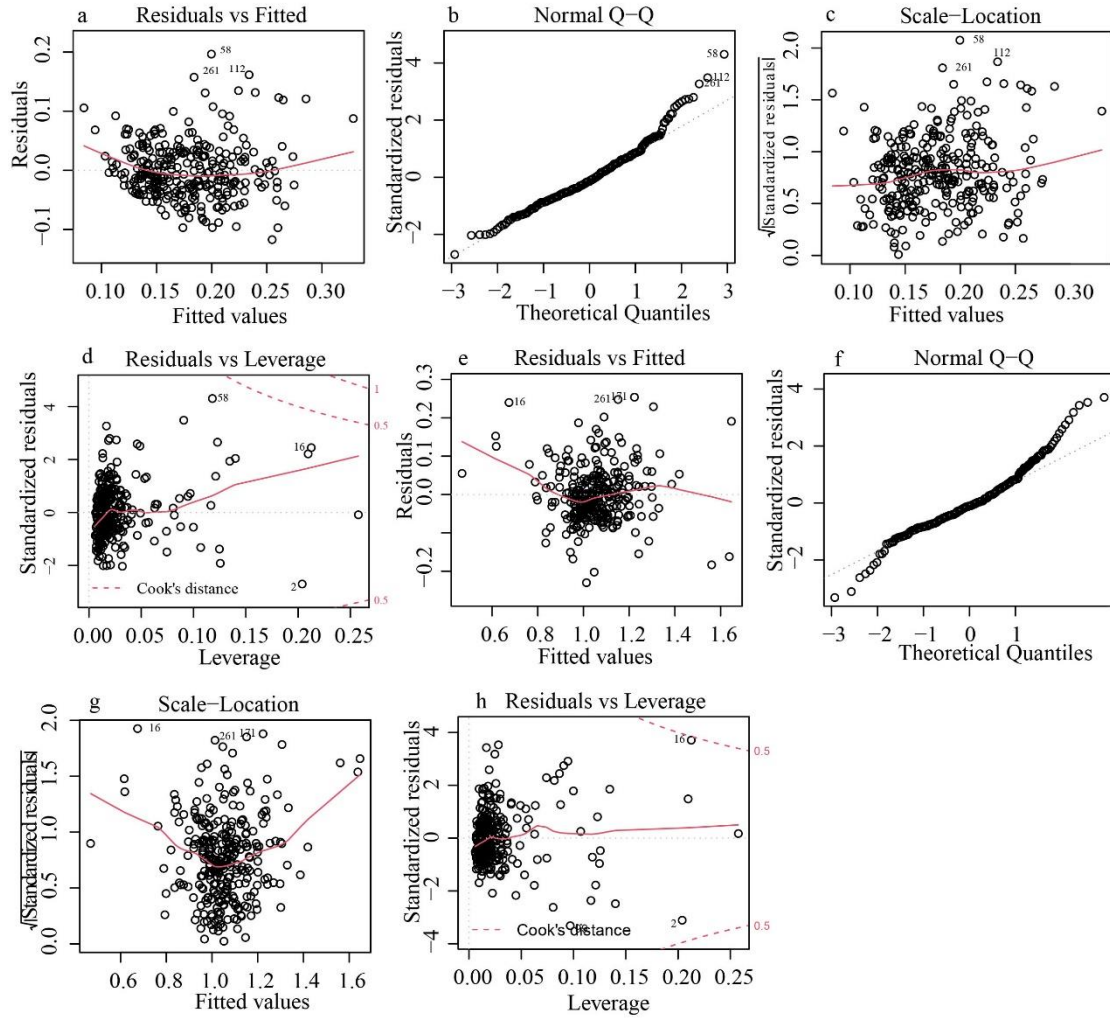

**Figure S2.** Residual error analysis and outlier detection of two models. (a-d): SI, (e-f): AR.

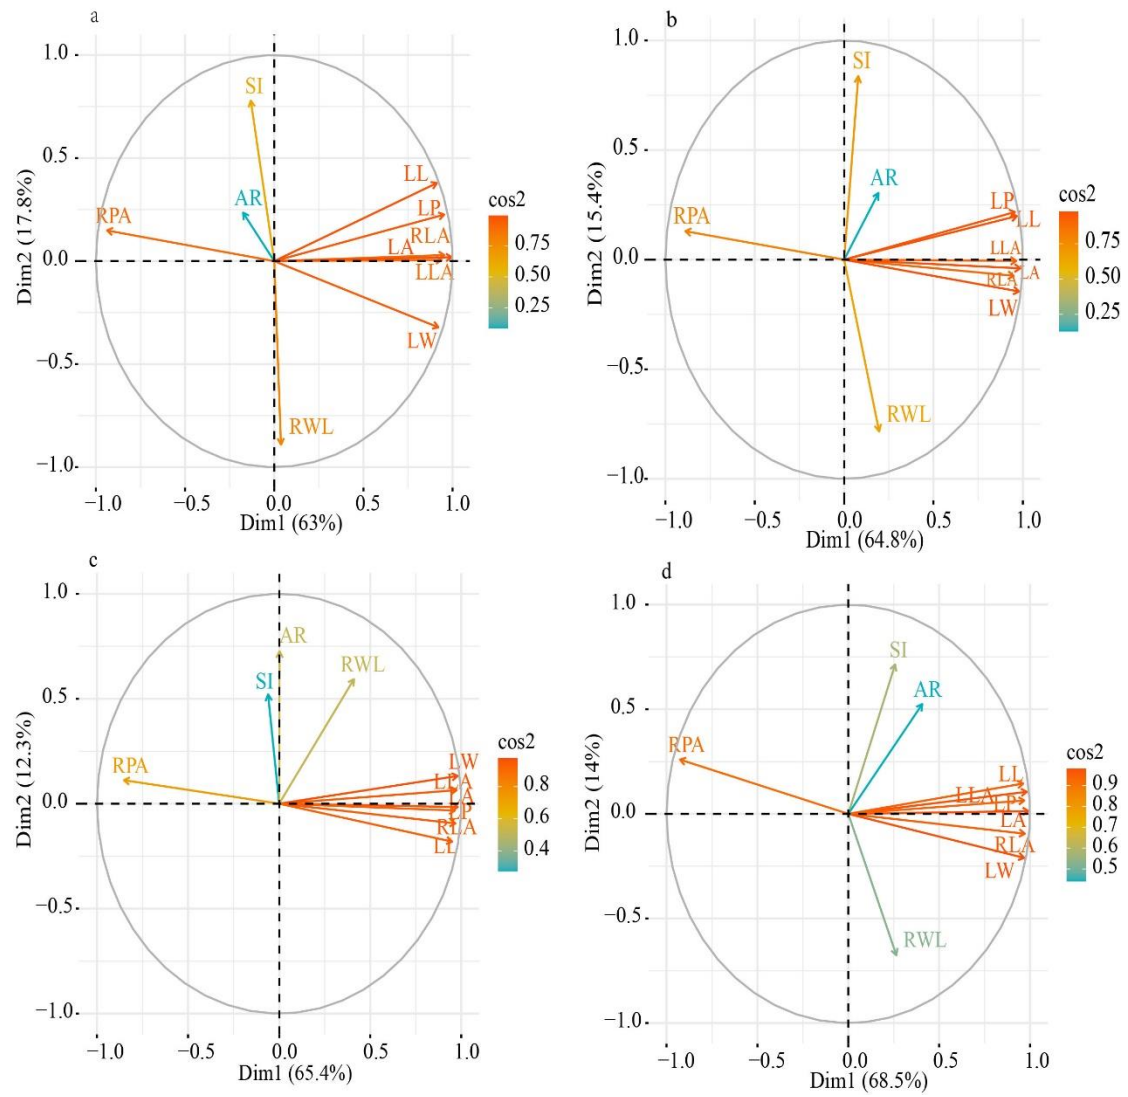

**Figure S3.** Correlation and important value of 10 leaf phenotypic variables. (a): *Q. acutissima*; (b): *Q. variabilis*; (c): *Q. fabri*
